# Supplementary material for: Distinct Thalamic and Frontal Neuroanatomical Substrates in Children with Familial vs. Non-Familial Attention-Deficit/Hyperactivity Disorder (ADHD)
Source: MDPI journal article supplement (doi:10.3390/brainsci13010046), 2022-12-26
Supplement: s1 [file s1]

**Full model analyses for thickness:**

$$y = \alpha + b_1\text{ADHD} + b_2\text{Sex} + b_3\text{Age} + b_4\text{ Handedness} + b_5\text{Race} + b_6\text{Education} + b_7\text{Puberty} + b_8\text{IQ} + \gamma_i(\text{MRI manufacturer}) + \varepsilon$$

**Full model analyses for area and volume:**

$$y = \alpha + b_1\text{ADHD} + b_2\text{Sex} + b_3\text{Age} + b_4\text{ Handedness} + b_5\text{Race} + b_6\text{Education} + b_7\text{Puberty} + b_8\text{IQ} + b_9\text{ETIV} (\text{Estimated Total Intracranial Volume}) + \gamma_i(\text{MRI manufacturer}) + \varepsilon$$

**Table S1:** Full model results for gray matter neuroimaging measures between the control and ADHD groups.

| Anatomical Location | Measure      | TDC<br>Mean $\pm$ SD | ADHD<br>Mean $\pm$ SD | F-value | p-value |
|---------------------|--------------|----------------------|-----------------------|---------|---------|
| L. Cuneus           | Surface Area | 1676.39 $\pm$ 218.33 | 1633.97 $\pm$ 229.09  | 4.00    | 0.046   |
| R. Middle Temporal  | Surface Area | 3997.17 $\pm$ 502.91 | 4011.51 $\pm$ 510.05  | 2.37    | 0.124   |

Means were compared using independent sample t-tests. SD: Standard Deviation. ADHD: Attention deficits/hyperactivity disorder group; TDC: Typically Developed Children.

**Table S2:** Full model results for gray matter neuroimaging measures between familial and non-familial subgroups of ADHD.

| Anatomical Location  | Measure            | ADHD-NF<br>Mean $\pm$ SD | ADHD-F<br>Mean $\pm$ SD | F-value | p-value |
|----------------------|--------------------|--------------------------|-------------------------|---------|---------|
| R. Pars Orbitalis    | Cortical Thickness | 3.00 $\pm$ 0.17          | 2.95 $\pm$ 0.15         | 3.28    | 0.071   |
| L. Inferior Temporal | Surface Area       | 3711.17 $\pm$ 498.36     | 3905.69 $\pm$ 579.72    | 7.58    | 0.006   |
| L. Middle Temporal   | Surface Area       | 3579.24 $\pm$ 446.97     | 3730.73 $\pm$ 540.07    | 5.32    | 0.022   |
| R. Thalamus          | Volume             | 7325.65 $\pm$ 649.59     | 7526.62 $\pm$ 770.62    | 3.027   | 0.083   |

Means were compared using independent sample t-tests. SD: Standard Deviation. ADHD-F: Familial ADHD. ADHD-NF: Non-familial ADHD.
